# Supplementary material for: Pigeon RIG-I Function in Innate Immunity against H9N2 IAV and IBDV
Source: PubMed Central journal article supplement (PMC4517142; doi:10.3390/v7072813), 2015-07-22
Supplement: viruses-07-02813-s001.pdf [file viruses-07-02813-s001.pdf]

## Supplementary Information

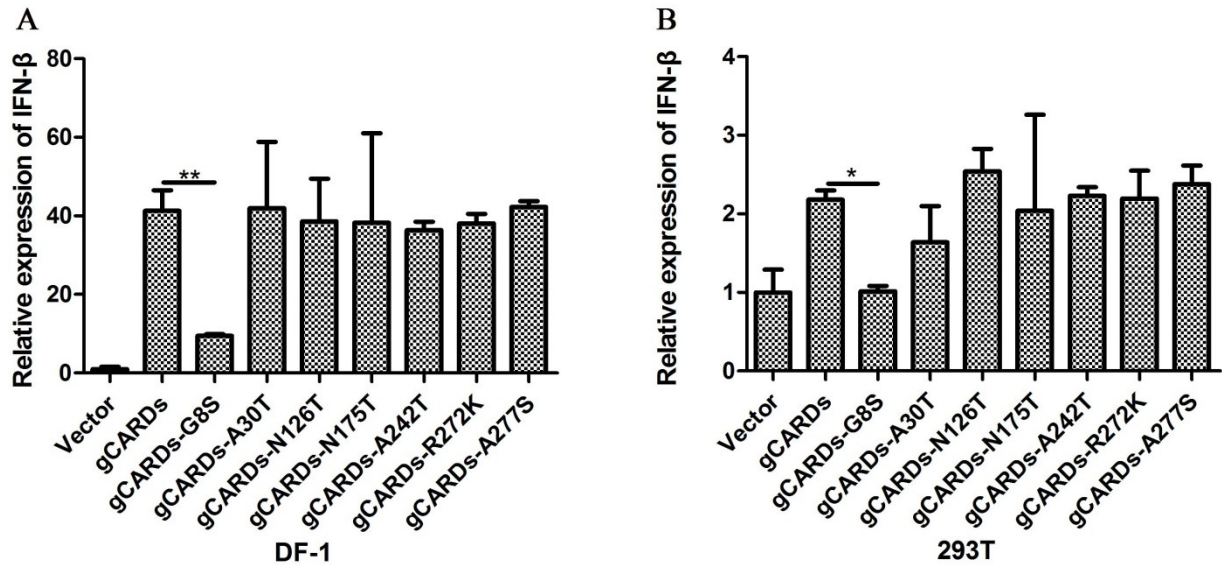

**Figure S1.** *IFN-β* mRNA levels induced by sites mutagenesis of gCARDs. DF-1 (A) and 293T (B) cells were transfected with recombinant plasmids for 24 h, then qRT-PCR were performed to detect *IFN-β* mRNA levels. Results are representative of two independent experiments (mean  $\pm$  SEM). \*  $p \leq 0.05$  vs. gCARDs, \*\*  $p \leq 0.05$  vs. gCARDs.
